# Supplementary material
Source: PubMed Central journal article supplement (PMC3273535)
Supplement: supp_110755_enrol-manns-3-at.pdf [file supp_110755_enrol-manns-3-at.pdf]

**Appendix 3 (as supplied by the authors): CIHI definition of diabetes-specific ambulatory care sensitive conditions<sup>1</sup>**

Inclusion

Most responsible (TYPE='M') diagnosis code from HOSPITALIZATIONS of:

| ICD- 9- CM Codes | ICD-9-CM Description                         | ICD-10-CA Codes | ICD-10-CA Description                                |
|------------------|----------------------------------------------|-----------------|------------------------------------------------------|
| 250.0            | DM without mention of complication           | E10.0^^         | Type 1 DM with coma                                  |
| 250.1            | Diabetes with ketoacidosis                   | E10.1^^         | Type 1 DM with acidosis                              |
| 250.2            | Diabetes with hyperosmolarity                | E10.63          | Type 1 DM with hypoglycaemia                         |
| 250.8            | Diabetes with other specified manifestations | E10.9^^         | Type 1 DM without (mention of) complication          |
|                  |                                              | E11.0^^         | Type 2 DM with coma                                  |
|                  |                                              | E11.1^^         | Type 2 DM with acidosis                              |
|                  |                                              | E11.63          | Type 2 DM with hypoglycaemia                         |
|                  |                                              | E11.9^^         | Type 2 DM without (mention of) complications         |
|                  |                                              | E13.0^^         | Other specified DM with coma                         |
|                  |                                              | E13.1^^         | Other specified DM with acidosis                     |
|                  |                                              | E13.63          | Other specified DM with hypoglycaemia                |
|                  |                                              | E13.9^^         | Other specified DM without (mention of) complication |
|                  |                                              | E14.0^^         | Unspecified DM with coma                             |
|                  |                                              | E14.1^^         | Unspecified DM with acidosis                         |
|                  |                                              | E14.63          | Unspecified DM with hypoglycaemia                    |
|                  |                                              | E14.9^^         | Unspecified DM without (mention of) complication     |

OR any most responsible (TYPE='M') diagnosis code from Emergency Department visits of:

| ICD- 9- CM Codes | ICD-9-CM Description                   | ICD-10-CA Codes | ICD-10-CA Description                   |
|------------------|----------------------------------------|-----------------|-----------------------------------------|
| 250.xx           | Diabetes mellitus                      | E10.xx          | Insulin dependent diabetes mellitus     |
| 251.xx           | Other disorders of pancreatic internal | E11.xx          | Non-insulin dependent diabetes mellitus |

Appendix to: Manns BJ, Tonelli, Zhang J, et al. Enrolment in primary care networks: impact on outcomes and processes of care for patients with diabetes. *CMAJ* 2011. DOI:10.1503/cmaj110755.

Copyright © 2011 Canadian Medical Association or its licensors

|  |           |        |                                   |
|--|-----------|--------|-----------------------------------|
|  | secretion | E13.xx | Other specified diabetes mellitus |
|  |           | E14.xx | Unspecified diabetes mellitus     |

## Reference

1. Canadian Institute for Health Information. *Technical note: ambulatory care sensitive conditions (ACSC)*. Ottawa (ON): The Institute; 2010; Available: [www.cihi.ca/CIHI-ext-portal/pdf/internet/DEFINITIONS\\_052010\\_EN](http://www.cihi.ca/CIHI-ext-portal/pdf/internet/DEFINITIONS_052010_EN) (accessed 2011 Nov. 15).
