# Supplementary material
Source: PubMed Central journal article supplement (PMC3273535)

**Appendix 4: Differences in rates of admission to hospital or visits to emergency departments for diabetes-specific ambulatory care sensitive conditions (per 1000 patient months) for patients whose prevalent diabetes was managed in primary care networks versus those who were not enrolled in a network.**

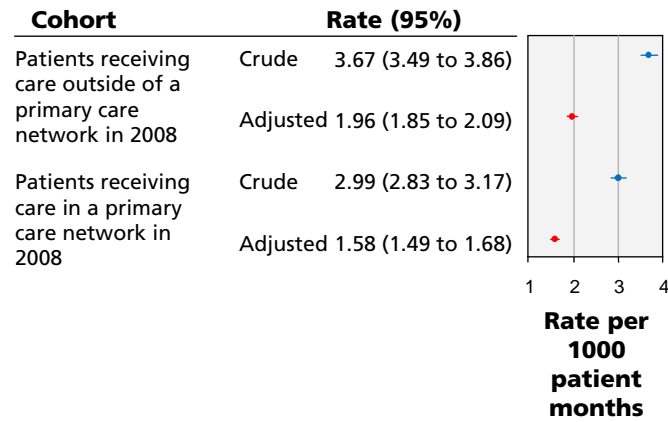

Supplement: supp_110755_enrol-manns-4-at.pdf [file supp_110755_enrol-manns-4-at.pdf]
